# Supplementary material for: Trained immunity modulates inflammation-induced fibrosis
Source: Nat Commun. 2019 Dec 11;10:5670. doi: 10.1038/s41467-019-13636-x (PMC6906311; doi:10.1038/s41467-019-13636-x)
Supplement: Supplementary file 1 — Supplementary Information [file 41467_2019_13636_MOESM1_ESM.pdf]

# **Supplementary information**

Trained immunity modulates  
inflammation-induced fibrosis

By Jeljeli *et al.*

## Supplementary Figure 1

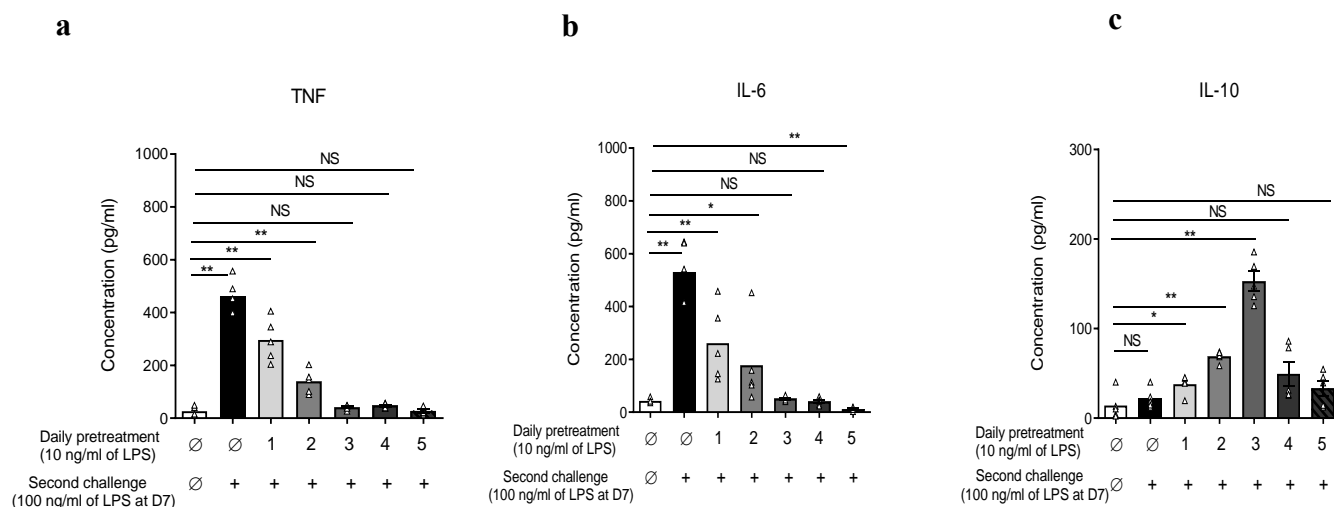

### Supplementary Figure 1. Dose-response adjustment for in vitro macrophage LPS training

**(a-c)** A dose-response adjustment for in vitro macrophage (lipopolysaccharide) LPS training was conducted in order to establish the optimal LPS dose to achieve endotoxin tolerance as reflected by pro-inflammatory cytokines (TNF and IL-6) blockage. Bone marrow derived macrophages were incubated with 10 ng/ml LPS for 1 up to 5 successive days, with daily change of the culture medium and were challenged by 100 ng/ml at day 7. Culture supernatants were collected and stored at -80°C for cytokine assessment. Cytokine production was also evaluated in cells without any LPS challenge (basal secretion) and after a unique inflammatory challenge on untrained cells (inflammatory response). Cell death was measured by trypan blue uptake and light microscopy. Optimal dose and duration of the challenge (10 ng/ml daily for 3 days) were selected on the training scheme that suppresses the pro-inflammatory cytokine production with a preservation of the cell viability (>90% of total cells).

Each box represents mean concentration (pg/ml)  $\pm$  SEM of the n=5 biologically independent samples. The two-way ANOVA test with Bonferroni correction was used to detect significant differences between the groups. NS: Not significant; \* $p \leq 0.05$ ; \*\* $p \leq 0.01$ . Source data are provided as a Source Data file.

## Supplementary Figure 2

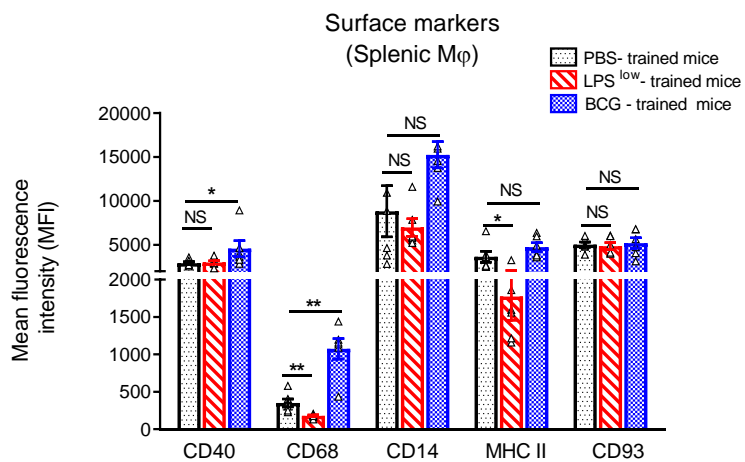

**Supplementary Figure 2. Effects of in vivo immune training on splenic macrophage phenotype**  
Flow cytometric analysis of splenic Mφ (Macrophages) phenotype at day 7 after training. (Remaining assessed macrophages markers). Data represent the mean fluorescence index (MFI) and SEM from n=6 biologically independent mice samples. The ANOVA test with Bonferroni correction was used to detect significant differences between the groups. NS: Non significant; \* $p \leq 0.05$ ; \*\* $p \leq 0.01$ ; \*\*\* $p \leq 0.001$ . Source data are provided as a Source Data file.

## Supplementary Figure 3

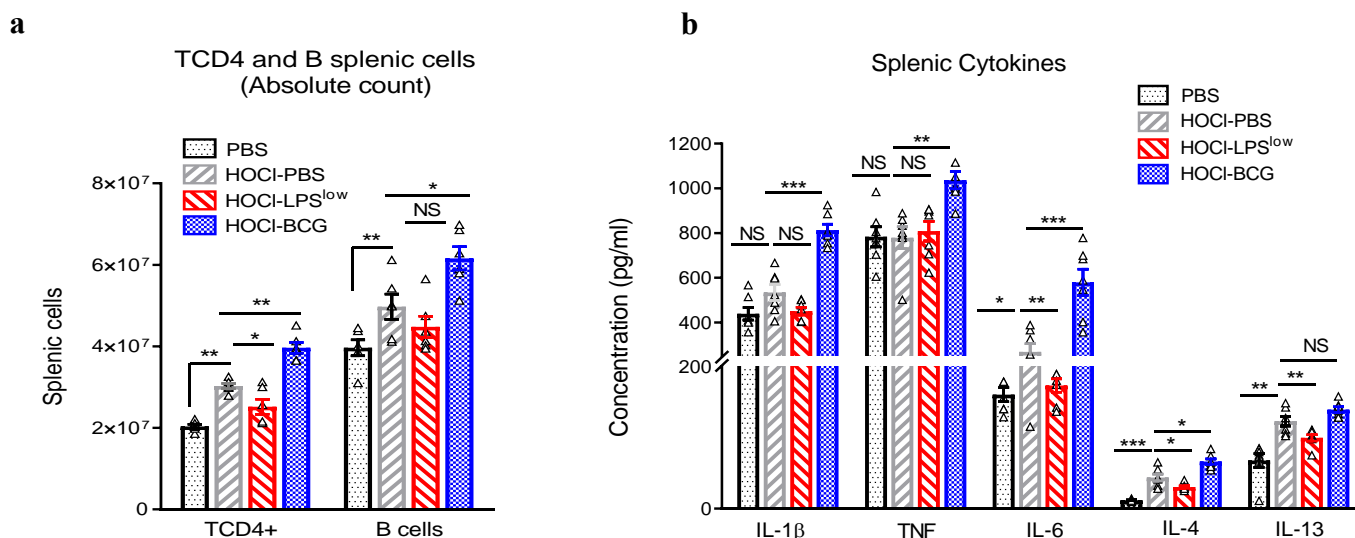

### Supplementary Figure 3. In vivo immune training impacts cytokine capacity production and T cells absolute count in murine HOCl-induced SSc during the inflammatory phase of the disease

**(a)** Flow cytometric characterization of splenic B cells and CD4+ T cells at day 22. Data represent the absolute count for T CD4+ and B cells with SEM from  $n=5$  biologically independent samples.

**(b)** Cytokine production in spleen cells culture supernatant (ELISA assessment) after stimulation with Concanavaline A. Each box represents mean  $\pm$  SEM obtained with cell culture from  $n=7$  biologically independent mice. The ANOVA test with Bonferroni correction was used to detect significant differences between the groups. NS: Not significant; \* $p \leq 0.05$ ; \*\* $p \leq 0.01$ ; \*\*\* $p \leq 0.001$ . Source data are provided as a Source Data file.

## Supplementary Figure 4

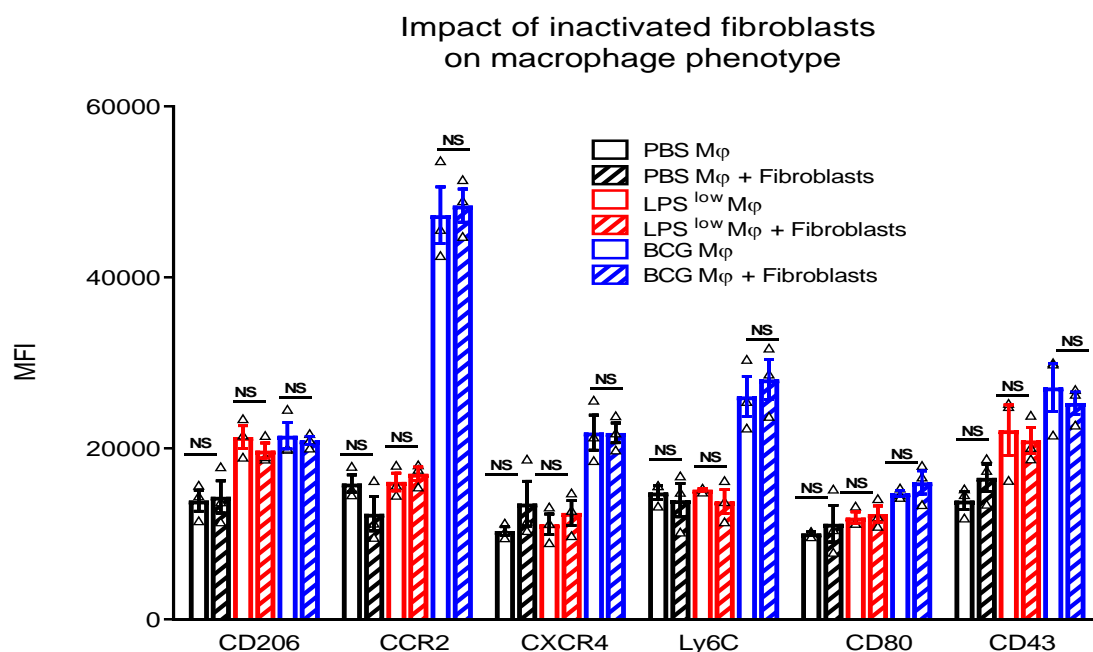

**Supplementary Figure 4. PBS (non-activated) fibroblasts do not affect macrophage phenotype**  
 Macrophage phenotype was assessed by flow cytometry after 48h of co-culture with non-activated fibroblasts. Data represent the mean fluorescence index (MFI) and SEM from n=3 biologically independent samples of each condition. The ANOVA test with Bonferroni correction was used to detect significant differences between the groups. NS: Non-significant. Mφ: Macrophages. Source data are provided as a Source Data file.

## Supplementary Figure 5

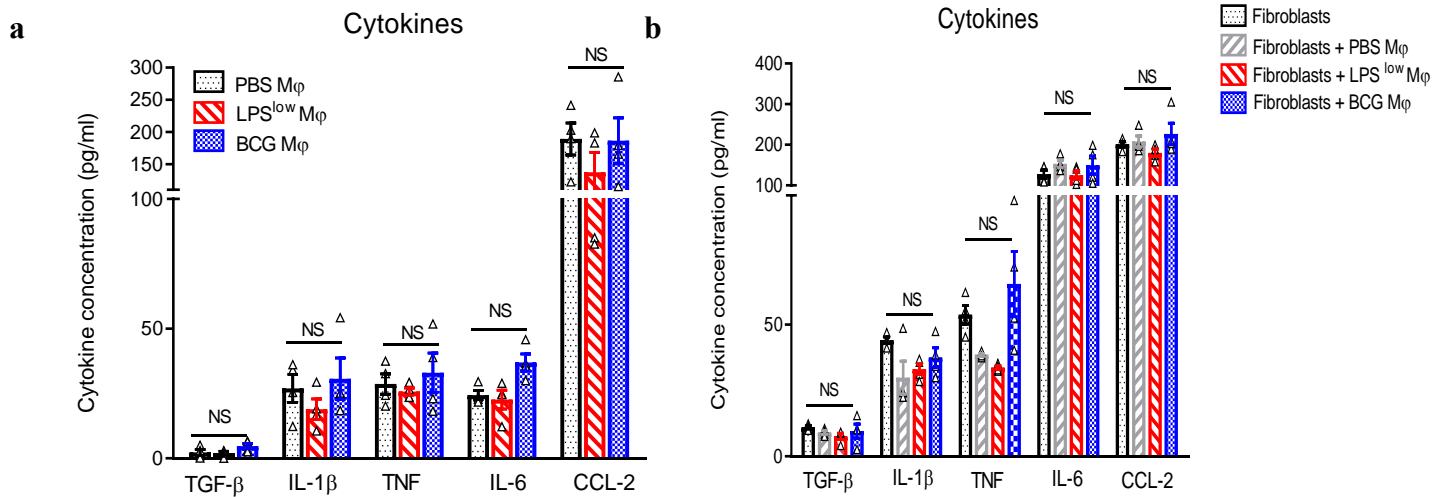

### Supplementary Figure 5. Cytokine production of trained macrophages cultured alone and with non-activated fibroblasts

**(a)** Basal cytokine production of un-stimulated murine trained macrophage cultured alone in medium. Each box represents mean  $\pm$  SEM from  $n=4$  biologically independent samples. **(b)** Cytokine production of murine trained macrophage after 48h of co-culture with non-activated fibroblasts. Each box represents mean  $\pm$  SEM from  $n=4$  biologically independent samples. The ANOVA test with Bonferroni correction was used to detect significant differences between the groups. NS: Not significant. Mφ: Macrophages. Source data are provided as a Source Data file.

Supplementary Figure 6

a

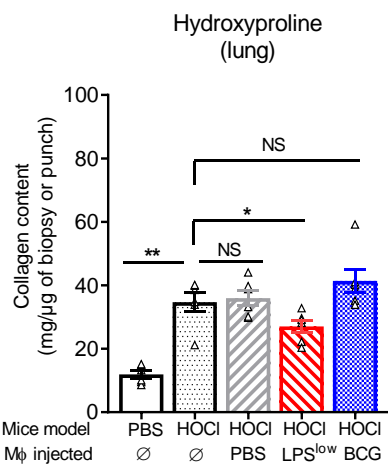

b

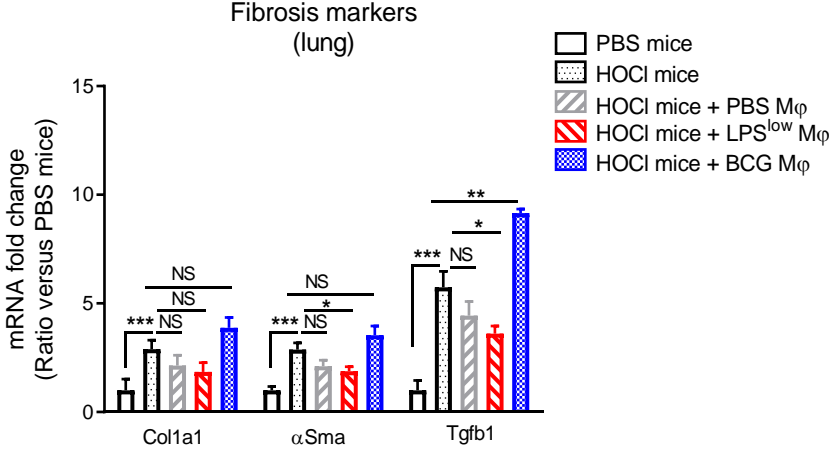

**Supplementary Figure 6. Impact of adoptive transfer of trained macrophages on pulmonary fibrosis**

**(a)** Collagen content in lung (Hydroxyproline dosage, mg/lobe of biopsy). Each box represents mean  $\pm$  SEM from  $n=6$  biologically independent mice. The ANOVA test with Bonferroni correction was used to detect significant differences between the groups. NS: Not significant;  $*p \leq 0.05$ ;  $**p \leq 0.01$ ;  $***p \leq 0.001$  **(b)** *Col1a1*, *α-sma* and *tgfb1* mRNA levels in lung. Results are expressed as fold increase  $\pm$  SEM versus the control group PBS derived from  $n=6$  biologically independent mice. NS: Not significant;  $*p \leq 0.05$ ;  $**p \leq 0.01$ ;  $***p \leq 0.001$ , (Unpaired t-test). Mφ: Macrophages. Source data are provided as a Source Data file.

Supplementary Figure 7

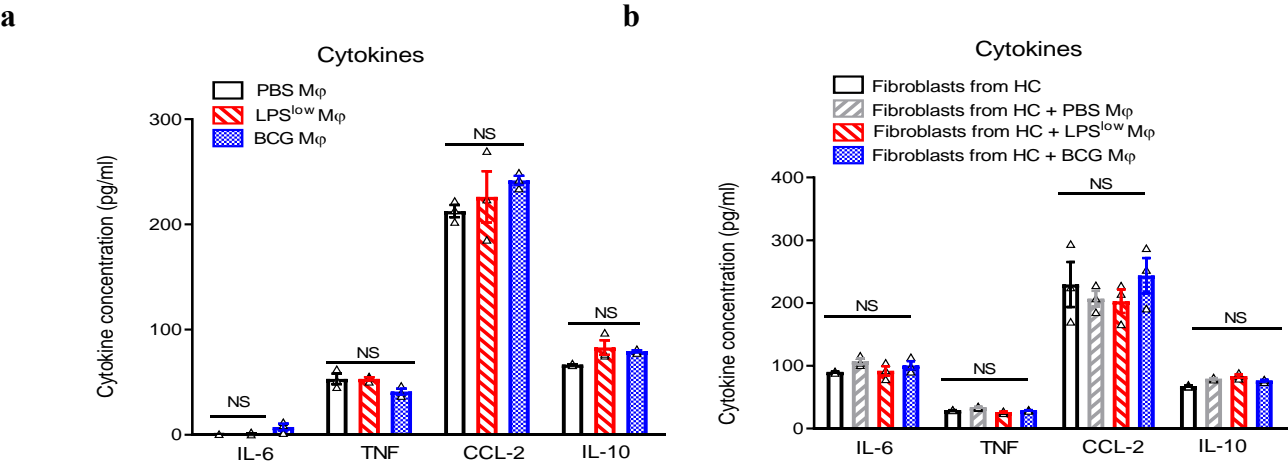

**Supplementary Figure 7. Basal cytokine production of trained macrophages cultured alone and with fibroblasts from healthy control**

**(a)** Basal cytokine production of un-stimulated human trained macrophages cultured alone in medium. **(b)** Cytokine production of human trained macrophage after 48h of co-culture with healthy fibroblasts. Each box represents mean  $\pm$  SEM from  $n=3$  biologically independent samples. The ANOVA test with Bonferroni correction was used to detect significant differences between the groups. Mφ: Macrophages. NS: Not significant; \* $p\leq0.05$ ; \*\* $p\leq0.01$ ; \*\*\* $p\leq0.001$ . Source data are provided as a Source Data file.

## Supplementary Figure 8

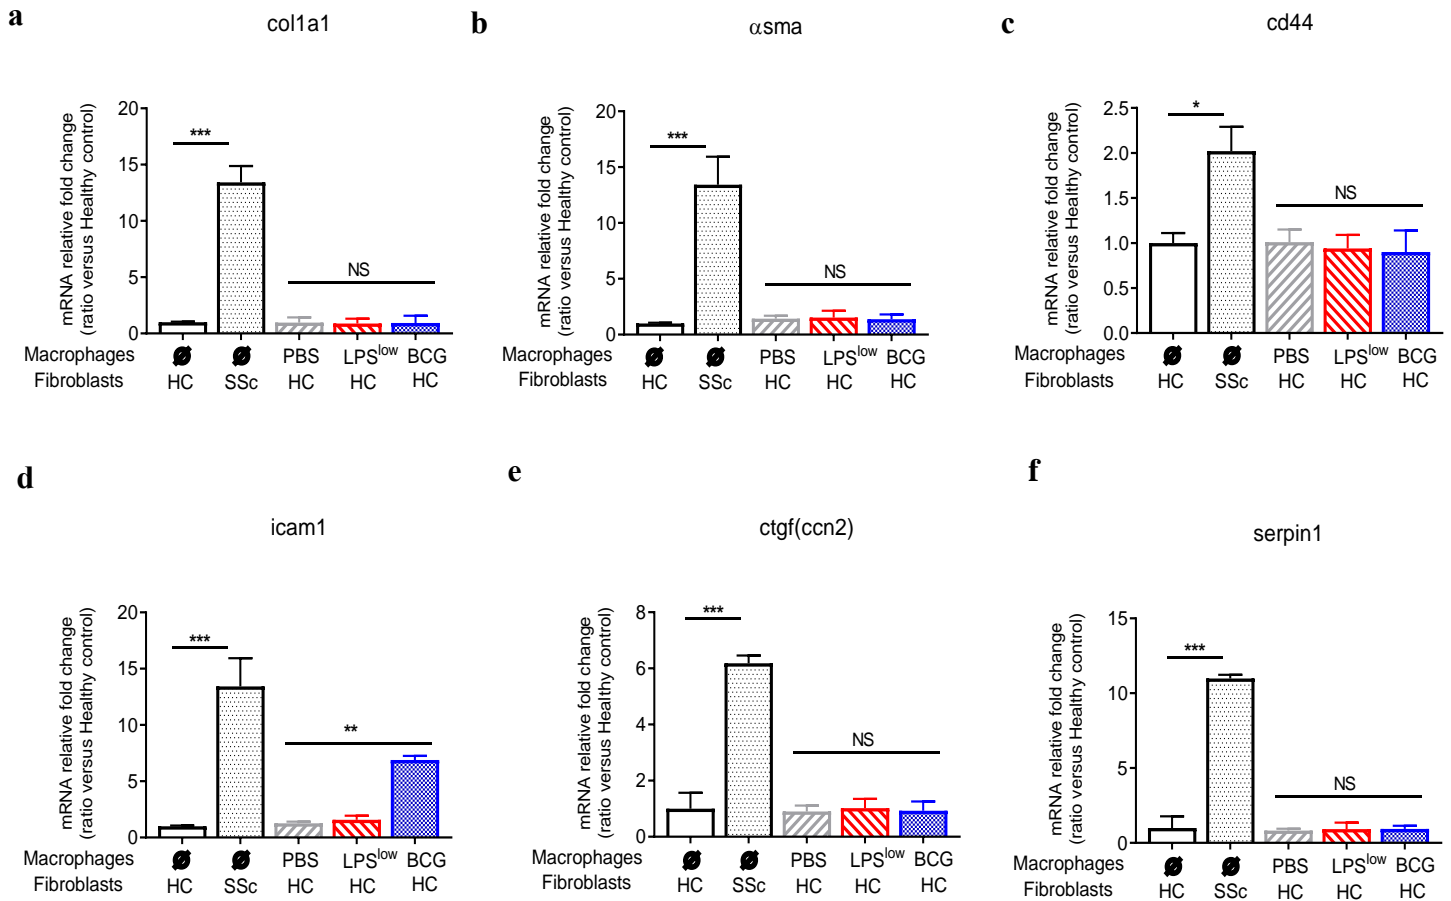

### Supplementary Figure 8. Gene expression of fibroblasts from HC co-cultured with trained macrophages

(a-f) RT-qPCR assessment of *αsma*, *coll1a1*, *cd44*, *icam-1*, *ctgf* and *serpin1* mRNA levels in fibroblasts from healthy controls after 48h of co-culture with trained macrophages and results are expressed as mean fold increase ± SEM from n=3 biologically independent samples. mRNA expression from diseased SSc fibroblasts is shown in each graph as a positive control. NS: Not significant; \*p≤0.05; \*\*p≤0.01; \*\*\*p≤0.001, (Unpaired t-test). Source data are provided as a Source Data file.

## Supplementary Figure 9

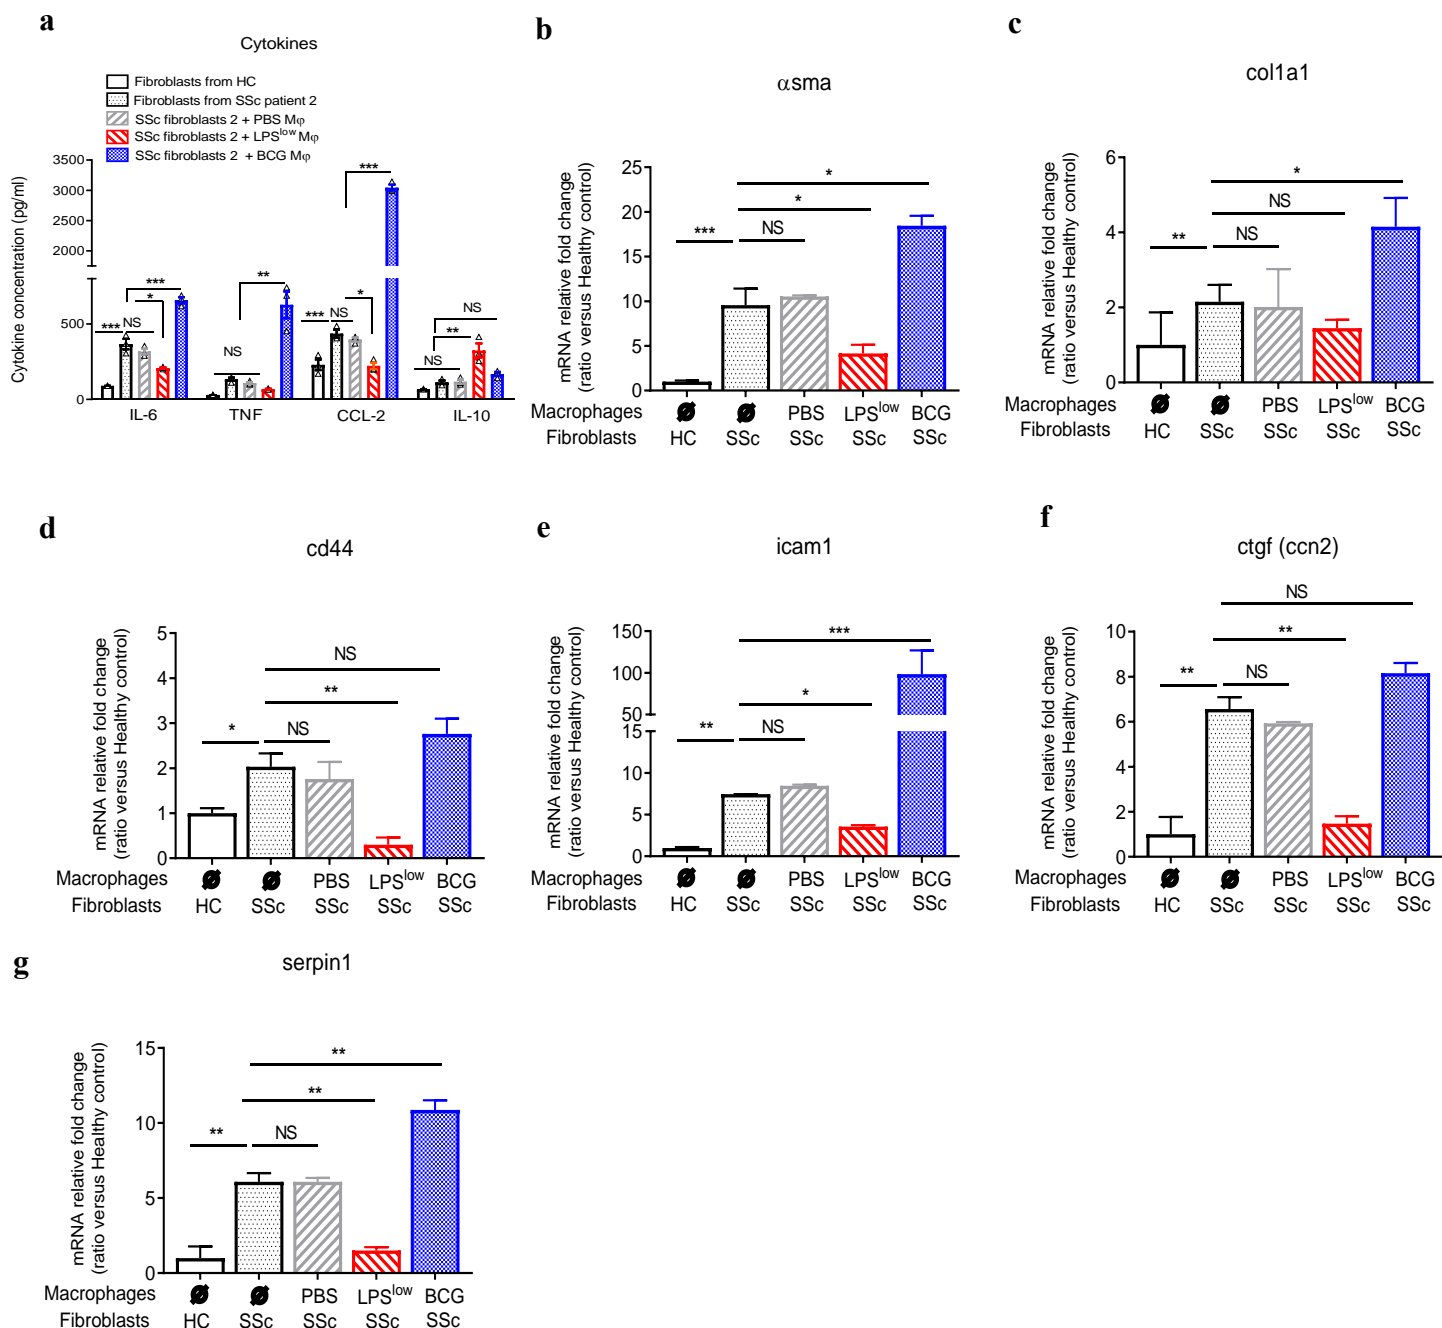

### Supplementary Figure 9. Additional experiment conducted on another myofibroblasts lineage from a second SSc patient.

(a) Cytokine production (IL-6, TNF, CCL-2 and IL-10) was assessed by ELISA in co-culture supernatant after 48 h of incubation (pg/mL). Each box represents mean  $\pm$  SEM from  $n=3$  biologically independent samples. The ANOVA test with Bonferroni correction was used to detect significant differences between the groups. (b-g) RT-qPCR assessment of  $\alpha$ -sma, *colla1*, *cd44*, *icam-1*, *ctgf* and *serpin1* mRNA levels, after 48h of co-culture and results are expressed as mean fold increase  $\pm$  SEM from  $n=3$  biologically independent samples. NS: Not significant; \* $p \leq 0.05$ ; \*\* $p \leq 0.01$ ; \*\*\* $p \leq 0.001$  (Unpaired t-test). Mφ: Macrophages. Source data are provided as a Source Data file.

## Supplementary Figure 10

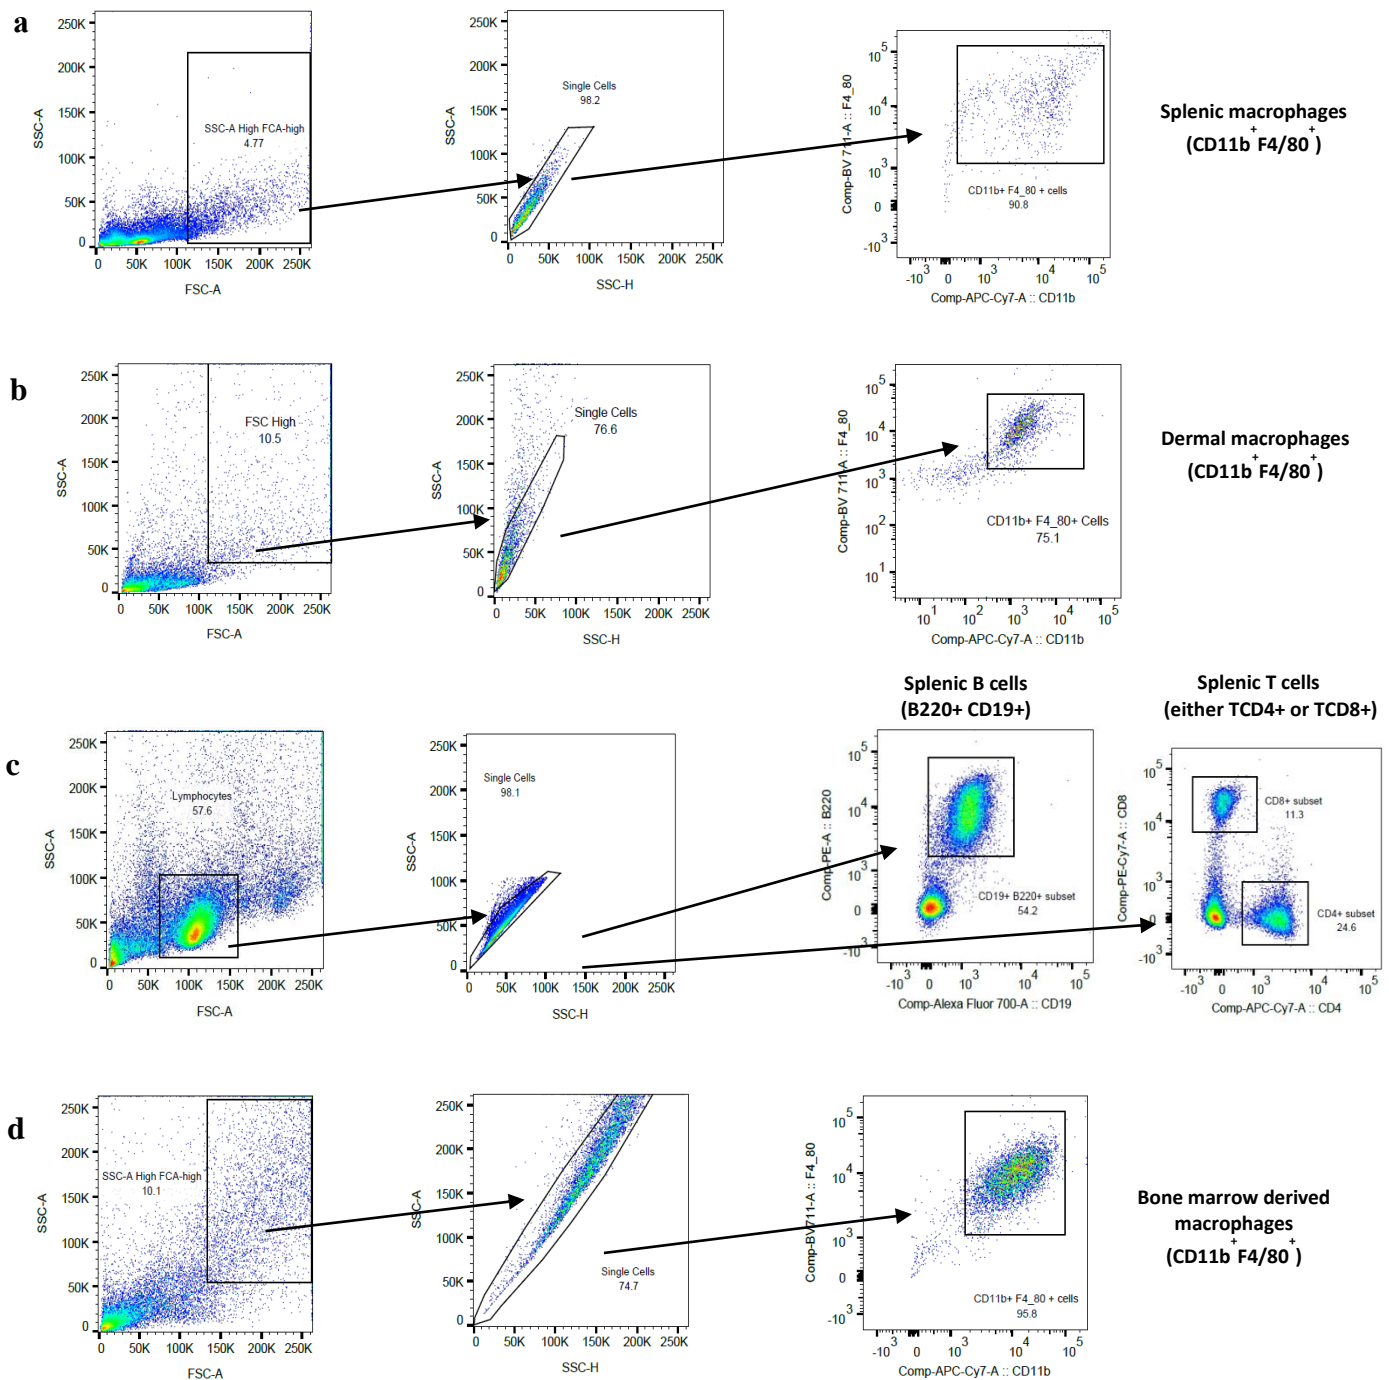

### Supplementary Figure 10. Gating strategies used for flow cytometry analysis

**(a)** Flow cytometric gating strategy to detect splenic macrophages from Balb/c mice for further analysis of surface markers expression. High FCS-A population was considered and splenic macrophages were identified as CD11b<sup>+</sup> F4/80<sup>+</sup> double positive cells and presented in Figs.1b-g and Supplementary Fig.2. **(b)** Flow cytometric gating strategy to identify dermal macrophages from Balb/c mice for further surface markers analysis present on Figs.2b and 5g. **(c)** Flow cytometric gating strategy to analyze the frequency and expression of activation markers on B cells (B220<sup>+</sup> CD19<sup>+</sup>) and TCD4<sup>+</sup> cells (CD4<sup>+</sup> CD8<sup>-</sup>) isolated from spleen, present on Fig.2b and Supplementary Fig.3b **(d)** Flow cytometric gating strategy to identify macrophages (Gated as CD11b<sup>+</sup> F4/80<sup>+</sup>) derived from the bone marrow of Balb/c mice and used for co-culture experiments illustrated on Fig.4b and Supplementary Fig. 4.

**Supplementary Table 1:** List of primers sequences used for real time quantitative PCR and ChIP analysis

| <b>Murine primers used for ChIP analysis</b>                          |                               |                               |
|-----------------------------------------------------------------------|-------------------------------|-------------------------------|
| <b>Gene Promoter</b>                                                  | <b>Forward sequence 5'-3'</b> | <b>Reverse sequence 5'-3'</b> |
| Tnf                                                                   | CACCCCGAAGTTCAGTAGACA         | GAAGTGGCAGAAGAGGCACT          |
| il-6                                                                  | TTTCTCCACGCAGGAGACTT          | TCCACGATTTCCAGAGAAC           |
| il-10                                                                 | GTGGCTATCACCGTGAGTA           | AAGCAACTGCCTCTCTGAGC          |
| <b>Murine primers used for RT-qPCR analysis for tissues and cells</b> |                               |                               |
| <b>Gene</b>                                                           | <b>Forward sequence 5'-3'</b> | <b>Reverse sequence 5'-3'</b> |
| $\beta$ -actin                                                        | ACCACCATGTACCCAGGCATT         | CCACACAGAGTACTTGCGCTCA        |
| $\alpha$ -sma                                                         | CTACGAACTGCCTGACGGG           | GCTGTTATAGGTGGTTTCGTGG        |
| Col1a1                                                                | TGTTCTGTGGTCTCAGGGTAG         | TTGTCGTAGCAGGGTTCTTTC         |
| Il-13                                                                 | GCAGCATGGTATGGAGTGTG          | TGGCGAAACAGTTGCTTTGT          |
| Tgfb1                                                                 | CACCGGAGAGCCCTGGATA           | TGTACAGCTGCCGCACACA           |
| <b>Human primers used for RT-qPCR analysis</b>                        |                               |                               |
| <b>Gene</b>                                                           | <b>Forward sequence 5'-3'</b> | <b>Reverse sequence 5'-3'</b> |
| Gapdh                                                                 | GCCACATCGCTCAGACAC            | GCCCAATACGACCAAATCC           |
| $\alpha$ -sma                                                         | CCACCGCAAATGCTTCTAAGT         | GGCAGGAATGATTTGGAAAGG         |
| Col I                                                                 | GAACGCGTGTCTATCCCTTGT         | GAACGAGGTAGTCTTTCAGCAACA      |
| Cd44                                                                  | CGGACACCATGGACAAGTTT          | GAAAGCCTTGCAGAGGTCAG          |
| icam-1                                                                | CAGAGGTTGAACCCACAGT           | CCTCTGGCTTCGTGAGAATC          |
| Ctgf (ccn2)                                                           | CAGCATGGACGTTCTGTCTG          | AACCACGGTTTGGTCCTTGG          |
| Serpin1                                                               | AGTGGACTTTTCAGAGGTGGA         | GCCGTTGAAGTAGAGGGCATT         |
